# Supplementary material for: Nanoscale effect on thermal decomposition kinetics of organic particles: dynamic vacuum stability test of 1,3,5-triamino-2,4,6-trinitrobenzene
Source: Royal Society of Chemistry journal article supplement (doi:10.1039/c3cp44344b), 2013-01-01
Supplement: c3cp44344b.pdf [file c3cp44344b.pdf]

## Electronic Supplementary Information

**Table S1** Selected kinetics models of thermal decomposition in the solid state.

| Reaction model No. | Reaction model                          | Model function                     |                           |                                                  |
|--------------------|-----------------------------------------|------------------------------------|---------------------------|--------------------------------------------------|
|                    |                                         | Type                               | Integral form $G(\alpha)$ | Differential form $f(\alpha)$                    |
| 4                  | Two-dimensional diffusion               | Jander equation, $n = 2$           | $[1-(1-\alpha)^{1/2}]^2$  | $(1-\alpha)^{1/2}[1-(1-\alpha)^{1/2}]^{-1}$      |
| 6                  | Three-dimensional diffusion             | Jander equation, $n = 2$           | $[1-(1-\alpha)^{1/3}]^2$  | $(3/2)(1-\alpha)^{2/3}[1-(1-\alpha)^{1/3}]^{-1}$ |
| 8                  | Three-dimensional diffusion             | Anti-Jander equation               | $[(1+\alpha)^{1/3}-1]^2$  | $(3/2)(1+\alpha)^{2/3}[(1+\alpha)^{1/3}-1]^{-1}$ |
| 17                 | Random nucleation and subsequent growth | Avrami-Erofeev equation, $n = 3/2$ | $[-\ln(1-\alpha)]^{3/2}$  | $(2/3)(1-\alpha)[- \ln(1-\alpha)]^{-1/2}$        |
| 20                 | Random nucleation and subsequent growth | Avrami-Erofeev equation, $n = 4$   | $[-\ln(1-\alpha)]^4$      | $(1/4)(1-\alpha)[- \ln(1-\alpha)]^{-3}$          |
| 41                 | Deceleration type of $\alpha-t$ curve   | Chemical reaction, $n = 3$         | $(1-\alpha)^{-2}$         | $(1/2)(1-\alpha)^3$                              |
